# Supplementary material
Source: PubMed Central journal article supplement (PMC1914152)
Supplement: plntphys_pp.107.099077_1.pdf [file plntphys_pp.107.099077_1.pdf]

## Supplemental Fig. 1

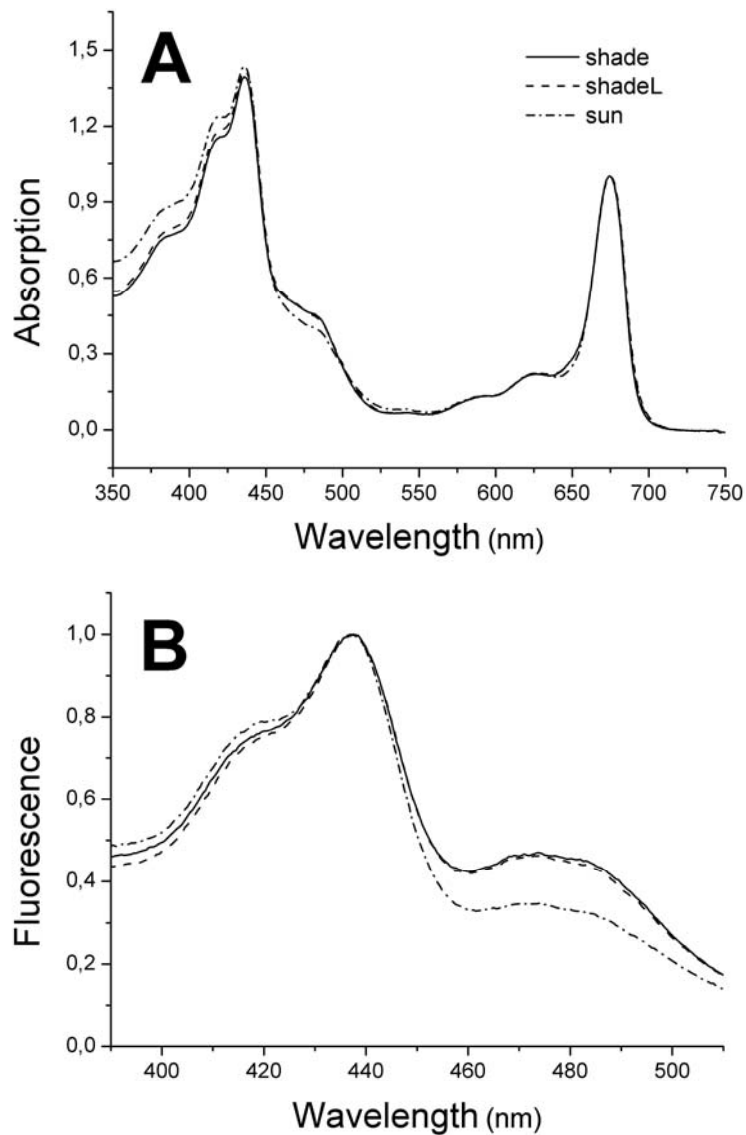

**Supplemental Figure 1.** Room-temperature absorption (A) and fluorescence excitation spectra (B) of the PSII-enriched fractions (band 5b) of shade (solid line), shadeL (dashed line) and sun (dash-dotted line). Fluorescence excitation spectra were measured by detecting at 680 nm. Absorption spectra were normalized to the maximum in the Q<sub>y</sub> region. Fluorescence excitation spectra were normalized to the maximum. Pigment compositions of these samples are given in Table III.
