# Supplementary material
Source: PubMed Central journal article supplement (PMC1914152)
Supplement: plntphys_pp.107.099077_2.pdf [file plntphys_pp.107.099077_2.pdf]

## Supplemental Fig.2

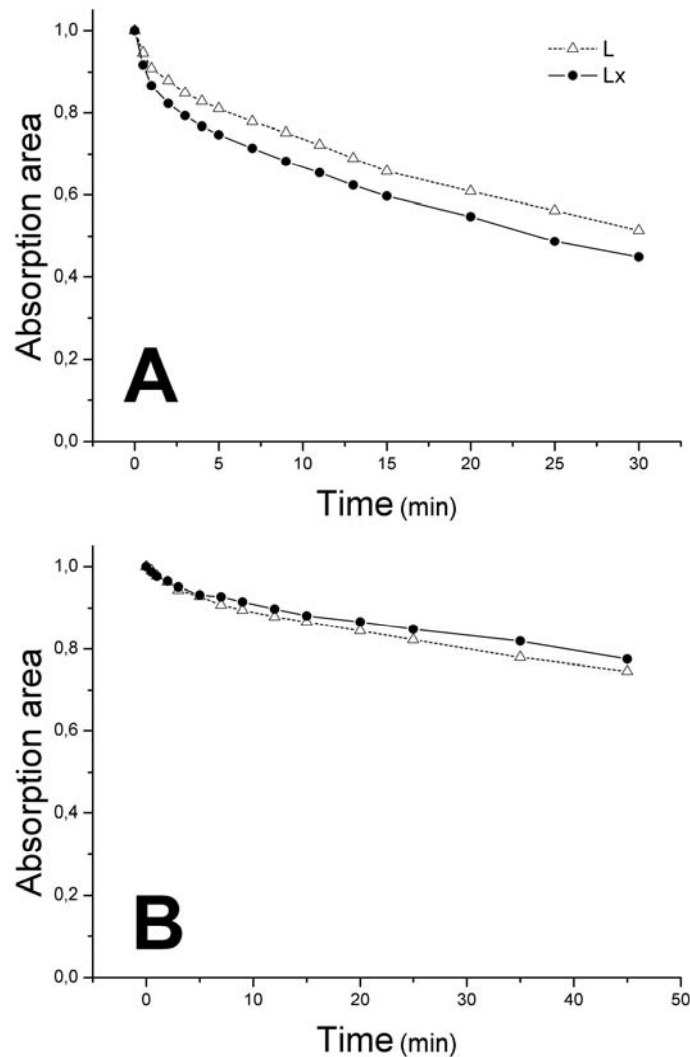

**Supplemental Figure 2.** Comparison of photobleaching kinetics in the recombinant Lhcb5 (A) and Lhcb1 (B) reconstituted with Lx (closed circle) or L (open triangle) as the single xanthophyll species. Photobleaching was monitored by measuring chlorophyll absorption in the red region (600-750 nm) during the light treatment ( $4000 \mu\text{mol m}^{-2} \text{s}^{-1}$ ) at  $10^\circ\text{C}$ . The area of the absorption spectrum between 600 and 750 nm was calculated for each measuring point and normalized to the original value obtained at the beginning of the experiment. (A) The photobleaching kinetics were very similar in the two Lhcb5 samples except for the somewhat faster bleaching in the first 1-2 minutes for the sample reconstituted with Lx. (B) The Lhcb1 samples with Lx and with L manifested almost identical time-courses of photobleaching.
