# Supplementary material
Source: PubMed Central journal article supplement (PMC1914152)
Supplement: plntphys_pp.107.099077_3.pdf [file plntphys_pp.107.099077_3.pdf]

**Supplemental Table I.** *Carotenoid composition of free-pigment fractions (band 1)*

Carotenoid concentrations are normalized to 100 chlorophyll molecules. None of the samples contained detectable amounts of zeaxanthin or antheraxanthin (nd). n=3 ( $\pm$ SD).

|        | N          | V          | Lx         | L          | A+Z | $\alpha$ -car | $\beta$ -car |
|--------|------------|------------|------------|------------|-----|---------------|--------------|
| shade  | 12.7 (0.1) | 12.7 (0.4) | 50.6 (2.2) | 16.1 (0.6) | nd  | 15.6 (0.1)    | 3.2 (0.1)    |
| shadeL | 13.0 (0.8) | 8.1 (0.6)  | 17.0 (0.5) | 47.8 (0.2) | nd  | 18.7 (0.9)    | 6.3 (0.1)    |
| sun    | 8.6 (0.2)  | 21.1 (0.3) | 23.2 (0.7) | 28.0 (0.5) | nd  | 11.0 (0.3)    | 7.2 (0.1)    |
